# Supplementary material
Source: Springer Nature journal article supplement (https://www.springermedizin.de/resource/supplementary/12933_2011_428_MOESM9_ESM.pdf/9538650)

**A**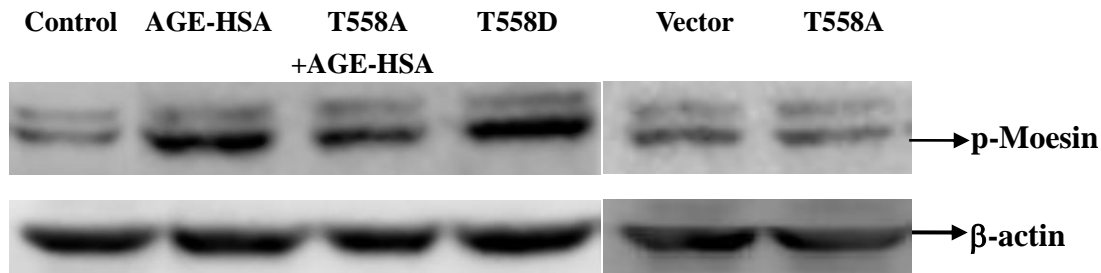**B**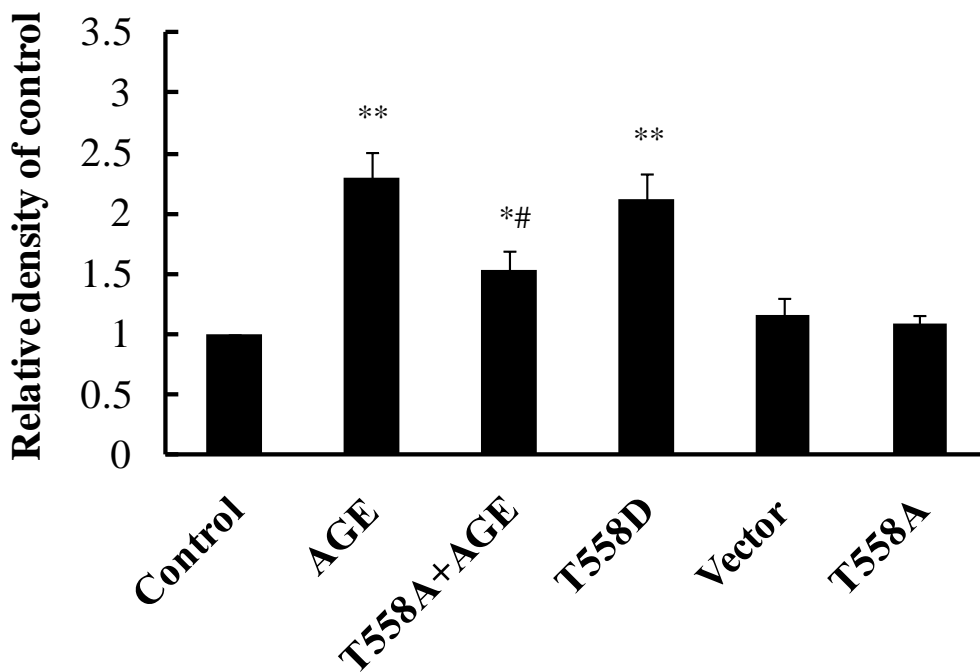

Supplement: MOESM9 [file 9538650]
